# Supplementary material for: Dispersing hydrophilic nanoparticles in nonaqueous solvents with superior long-term stability
Source: Royal Society of Chemistry journal article supplement (doi:10.1039/c7ra03472e), 2017-01-01
Supplement: c7ra03472e1.pdf [file c7ra03472e1.pdf]

## Dispersing Hydrophilic Nanoparticles in Nonaqueous Solvents with Superior Long-Term Stability

Muhan Cao,<sup>‡a</sup> Qipeng Liu,<sup>‡a</sup> Min Chen,<sup>‡a</sup> Peipei Yang,<sup>a</sup> Yong Xu,<sup>a</sup> Haihua Wu,<sup>a</sup> Jia Yu,<sup>a</sup> Le He,<sup>\*a</sup> Xiao-Hong Zhang<sup>\*a</sup> and Qiao Zhang<sup>\*a</sup>

<sup>a</sup>Institute of Functional Nano & Soft Materials (FUNSOM), Jiangsu Key Laboratory for Carbon-Based Functional Materials & Devices, Soochow University, 199 Ren'ai Road, Suzhou, 215123, Jiangsu, PR China. Email: lehe@suda.edu.cn; xiaohong\_zhang@suda.edu.cn; qiaozhang@suda.edu.cn

<sup>‡</sup>These authors contribute equally to this work.

### Supporting Figures

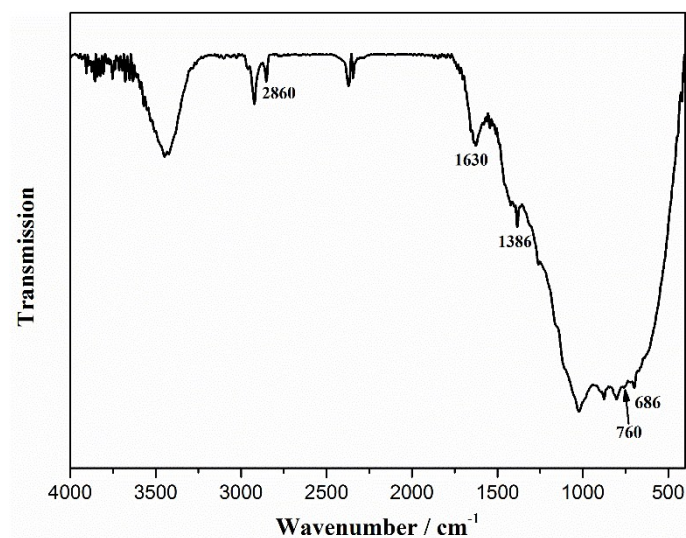

**Figure S1.** FTIR spectrum of polystyrene-capped Au nanospheres. The characteristic peaks of polystyrene can be observed, including at 686 cm<sup>-1</sup> (benzene ring folding), 760 cm<sup>-1</sup> (C-H bending of the benzene ring), 1386 and 1630 cm<sup>-1</sup> (C-C stretching of the benzene ring), and 2860 cm<sup>-1</sup> (saturation band C-H stretching)

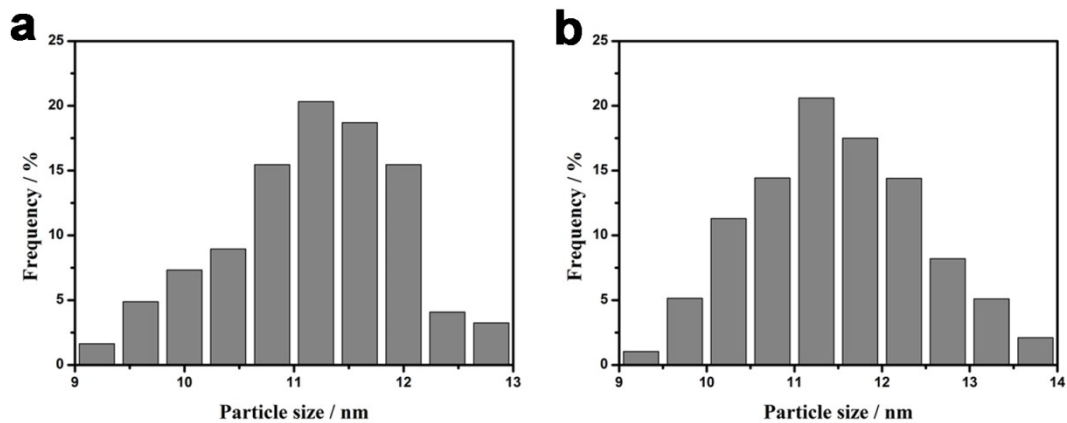

**Figure S2.** Size distributions of Au nanoparticles and PS-capped Au nanoparticles. The average sizes are 11.2 and 11.4 nm for Au nanoparticles and PS-capped Au nanoparticles, respectively.

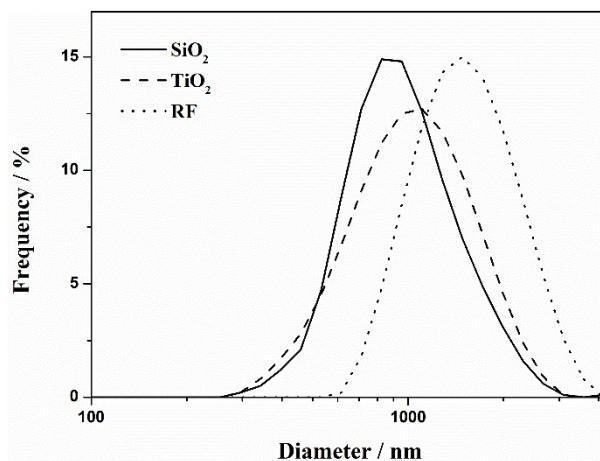

**Figure S3.** DLS curves of the polystyrene-capped SiO<sub>2</sub>, TiO<sub>2</sub>, RF colloids in toluene.
